# Supplementary material for: What do sales data tell us about implant survival?
Source: PLoS One. 2017 Feb 21;12(2):e0171128. doi: 10.1371/journal.pone.0171128 (PMC5319692; doi:10.1371/journal.pone.0171128)
Supplement: S1 File — This excel file contains loss and sales data. Type of implant (root, screw, screw_plus) is provided in column 1, length of sold implant in column 2, diameter in column 3, respectively, Type A (early losses) in column 4, type B (intermediate) losses in column 5, type C (late) losses in column 6, total number of not returned implants in column 7. Thus, the total number of sold implants of one type, length and diameter is the sum of colmns 5, 6, and 7. (XLSX) [file pone.0171128.s001.xlsx]

## Sheet: data_forPlosOne.csv
Type	Length	Diameter	LossA	LossB	LossC	NonLoss
Root	9	3.8	9	4	1	208
Root	11	3.8	36	7	2	1047
Root	13	3.8	66	8	3	2145
Root	16	3.8	17	1	0	881
Root	9	4.3	7	3	1	208
Root	11	4.3	38	4	4	1143
Root	13	4.3	52	7	8	2066
Root	16	4.3	12	0	1	592
Root	9	5	7	3	0	121
Root	11	5	29	7	1	696
Root	13	5	19	6	3	1200
Root	16	5	8	0	0	234
Root	9	6	3	1	1	23
Root	11	6	11	3	0	102
Root	13	6	5	3	0	119
Root	16	6	2	2	0	30
Screw	9	3.8	44	14	1	1371
Screw	11	3.8	100	25	3	5177
Screw	13	3.8	112	16	5	6906
Screw	16	3.8	19	2	0	1139
Screw	9	4.3	24	5	0	1380
Screw	11	4.3	98	14	12	4732
Screw	13	4.3	81	18	8	5620
Screw	16	4.3	12	0	2	756
Screw	9	5	17	2	4	613
Screw	11	5	33	11	6	2011
Screw	13	5	23	9	0	1635
Screw	16	5	4	0	0	205
Screw	9	6	4	0	0	129
Screw	11	6	5	1	2	186
Screw	13	6	5	0	0	149
Screw	16	6	2	0	0	23
Screw_plus	9	3.8	24	7	2	1361
Screw_plus	11	3.8	103	14	4	4376
Screw_plus	13	3.8	78	10	3	4910
Screw_plus	16	3.8	22	1	0	704
Screw_plus	9	4.3	33	3	2	1147
Screw_plus	11	4.3	80	18	2	3918
Screw_plus	13	4.3	47	8	0	4199
Screw_plus	16	4.3	5	0	0	490
Screw_plus	9	5	11	2	0	560
Screw_plus	11	5	43	8	0	1563
Screw_plus	13	5	16	3	0	1069
Screw_plus	16	5	1	0	0	199
Screw_plus	9	6	2	0	0	111
Screw_plus	11	6	1	0	0	134
Screw_plus	13	6	1	0	0	61
Screw_plus	16	6	1	0	0	25
